# Supplementary material for: Non-redundant ISGF3 Components Promote NK Cell Survival in an Auto-regulatory Manner during Viral Infection
Source: PubMed Central journal article supplement — Cell Rep. Author manuscript; Available in PMC 2018 Sep 25. (PMC6153266; doi:10.1016/j.celrep.2018.07.060), 2018-08-21
Supplement: NIHMS1505381-supplement-1.pdf [file NIHMS1505381-supplement-1.pdf]

**Cell Reports, Volume 24**

**Supplemental Information**

**Non-redundant ISGF3 Components Promote  
NK Cell Survival in an Auto-regulatory Manner  
during Viral Infection**

**Clair D. Geary, Chirag Krishna, Colleen M. Lau, Nicholas M. Adams, Sofia V. Gearty, Yuri Pritykin, Allan R. Thomsen, Christina S. Leslie, and Joseph C. Sun**

# FIGURE S1

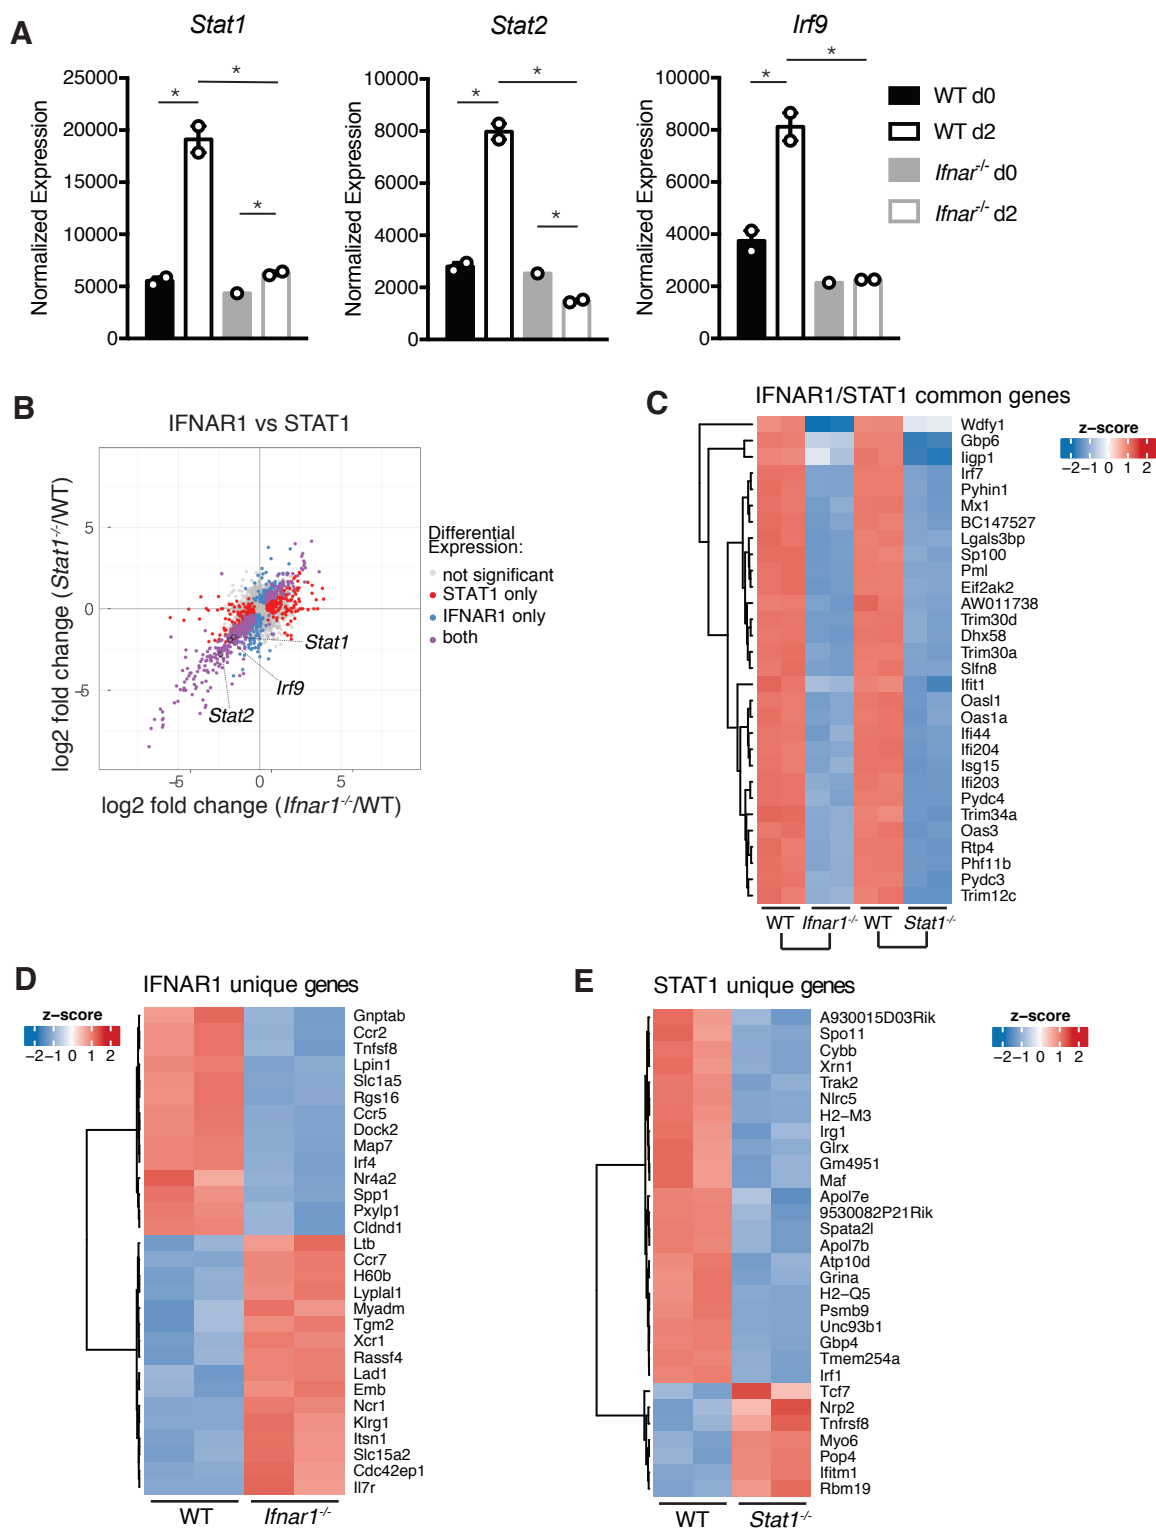

**Figure S1. Autoregulation of ISGF3 components *in vivo* following MCMV infection. Related to Figure 2.**

(A) Normalized counts of *Stat1*, *Stat2*, and *Irf9* in WT and *Ifnar1*<sup>-/-</sup> NK cells from RNA-seq. Symbols represent biological replicates, and error bars show SEM (\**P*<0.05). (B) Scatter plot of RNA-seq data comparing gene-level log<sub>2</sub> fold changes between *Ifnar1*<sup>-/-</sup> and WT NK cells versus *Stat1*<sup>-/-</sup> and WT NK cells at d1.5 PI. Red dots depict *Stat1*<sup>-/-</sup>/WT-unique expressed genes, blue dots *Ifnar1*<sup>-/-</sup>/WT-unique differentially expressed genes, and purple dots depict differentially expressed genes common to both. (C-E) Heatmaps of RNA-seq data as in B, depicting row-normalized log<sub>2</sub>-transformed counts of the top 30 differentially expressed genes ranked by adjusted *p* value, with base mean > 50, calculated by DESeq2. (C) Differentially expressed genes common to both *Ifnar1*<sup>-/-</sup> and *Stat1*<sup>-/-</sup>. Brackets indicate paired WT samples for *Ifnar1*<sup>-/-</sup> and *Stat1*<sup>-/-</sup>, respectively (see FIG 2A). (D) *Ifnar1*<sup>-/-</sup>/WT-unique differentially expressed genes. (E) *Stat1*<sup>-/-</sup>/WT-unique expressed genes.

## FIGURE S2

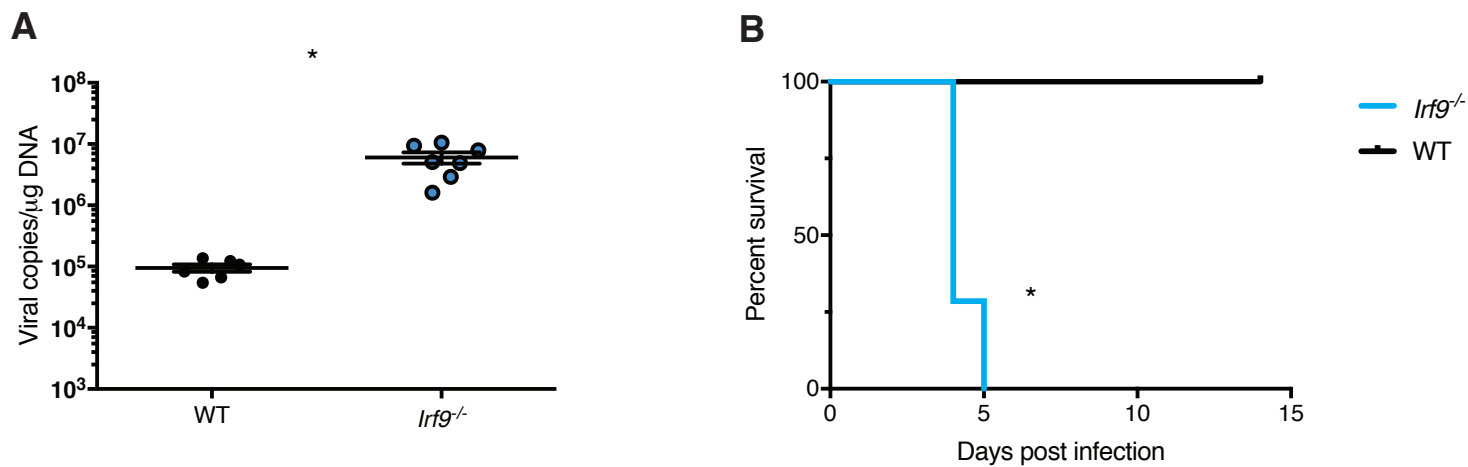

### Figure S2. IRF9 is essential for control of MCMV. Related to Figure 3.

Peripheral blood viral titers at day 4 p.i. (A) and Kaplan-Meier survival curves (B) for WT (black line, n=6) and *Irf9*<sup>-/-</sup> mice (blue line, n=7) challenged IP with a lethal dose of MCMV. Data are representative of one (A) or two (B) independent experiments with n=5-7 mice per group. Symbols represent individual mice, and error bars show SEM (\*P<0.05).

# FIGURE S3

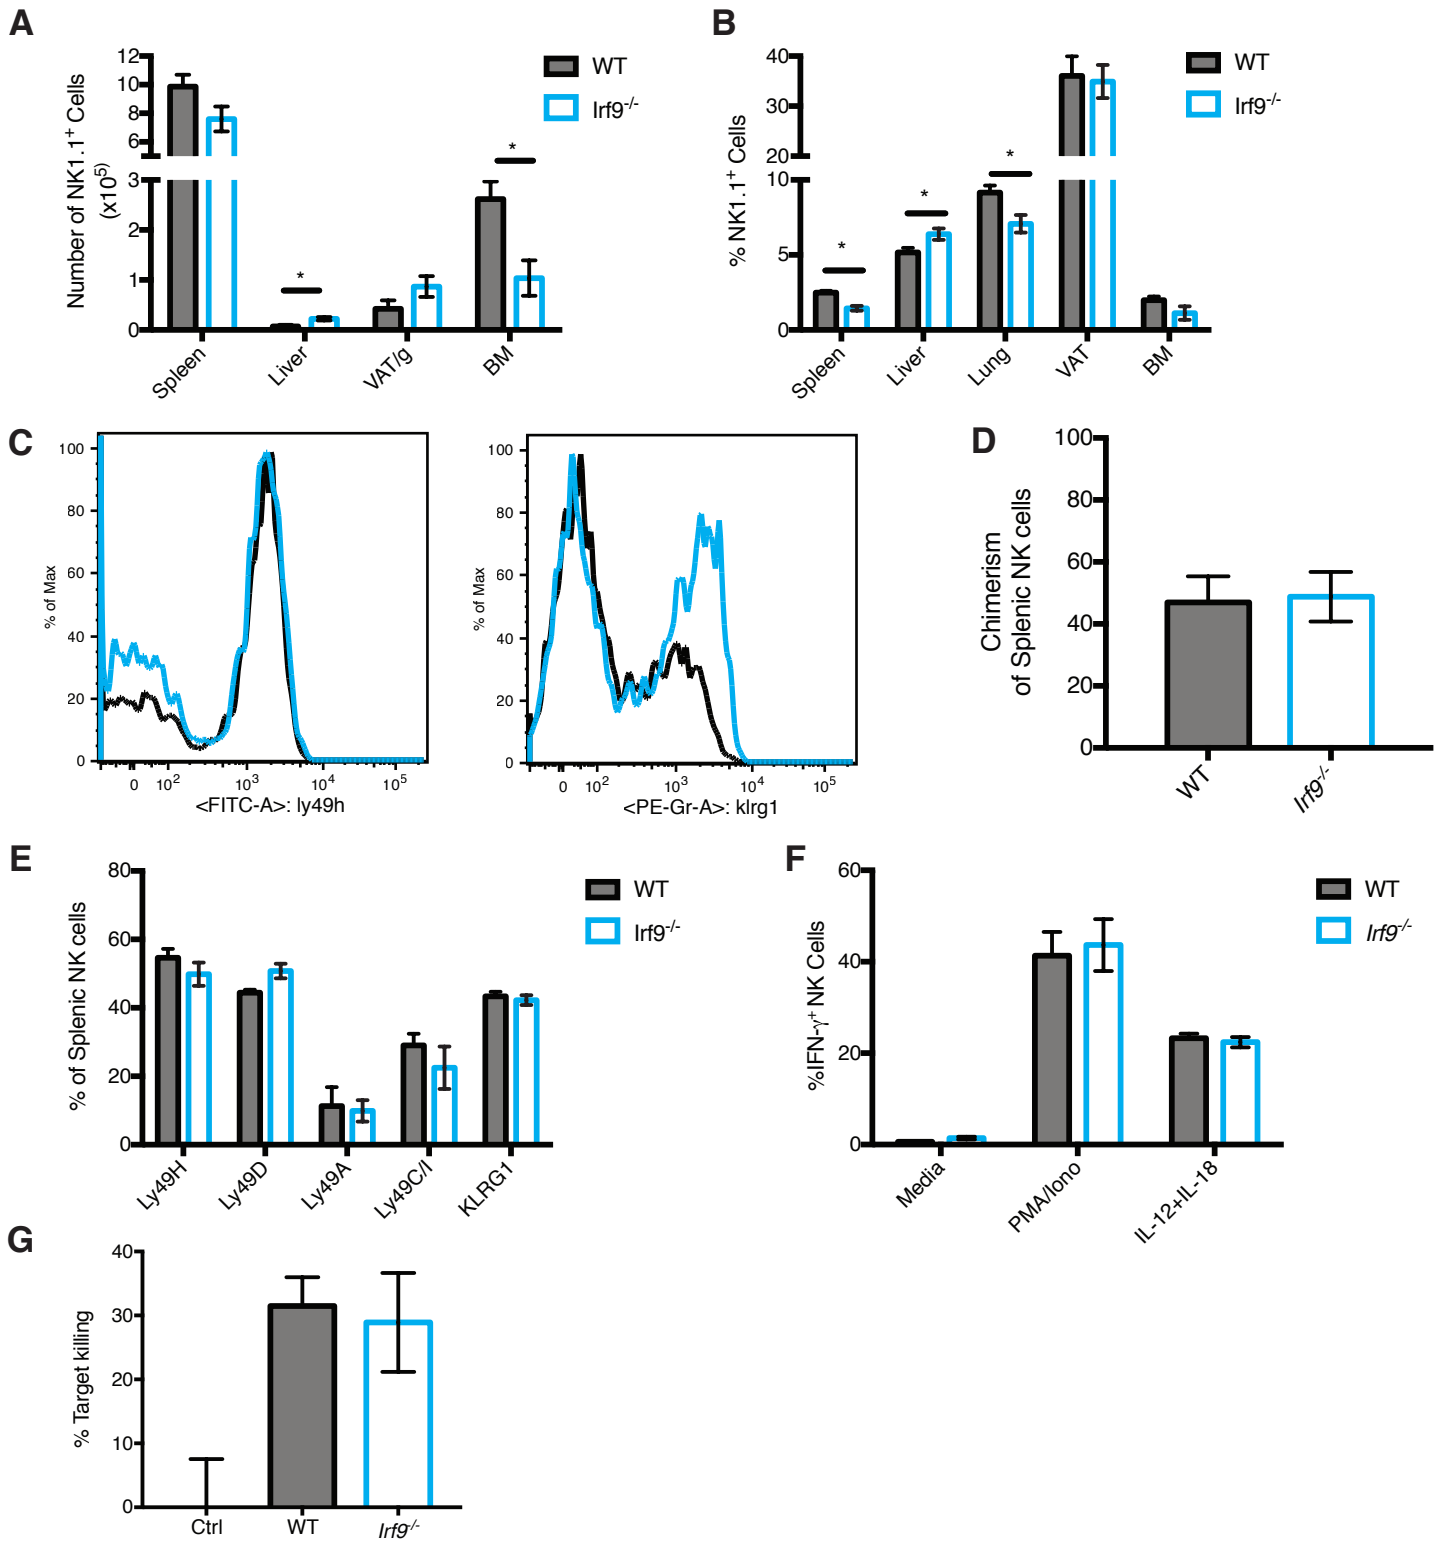

**Figure S3. Cell-extrinsic requirement for IRF9 for the development of NK cells. Related to Figure 3.**

Frequency (A) and absolute numbers (B) of NK cells in various organs of WT and *Irf9*<sup>-/-</sup> mice. (C) Representative histograms of Ly49H (left) and KLRG1 (right) expression of splenic NK cells in WT and *Irf9*<sup>-/-</sup> mice. (D-E) Lethally irradiated mice were injected with equal numbers of WT (CD45.1) and *Irf9*<sup>-/-</sup> (CD45.2) bone marrow cells. Following hematopoietic reconstitution, splenic NK cells were analyzed for contribution from each donor (D) and expression of activating and inhibitory receptors (E). (F) Percentage of splenic NK cells from mixed bone marrow chimeric mice producing IFN- $\gamma$  following 4 hour ex vivo stimulation with PMA/ionomycin or IL-12 + IL-18. (G) Purified splenic NK cells from WT and *Irf9*<sup>-/-</sup> mice were incubated with Ba/F3-m157 target cells (CTVhi) and Ba/F3 control cells (CTVlo) at 10:1:1 ratio (effector:target:control) for 7.5 hours. Quantification of target cell killing by indicated NK cell populations compared to control wells lacking NK cells. Data are presented as mean  $\pm$  SEM (\*P<0.05), and are representative of one (A, B, E, G), two (D, F) or three (C) independent experiments with n=2-5 mice per group.

# FIGURE S4

**A**

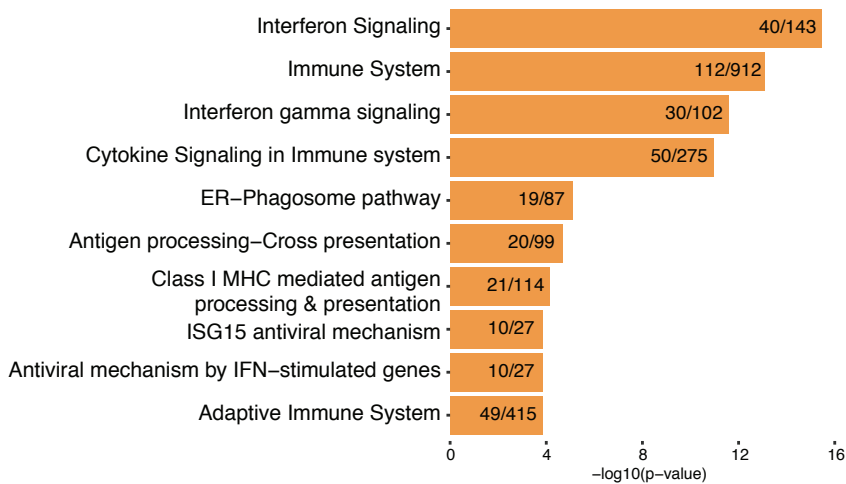

**B**

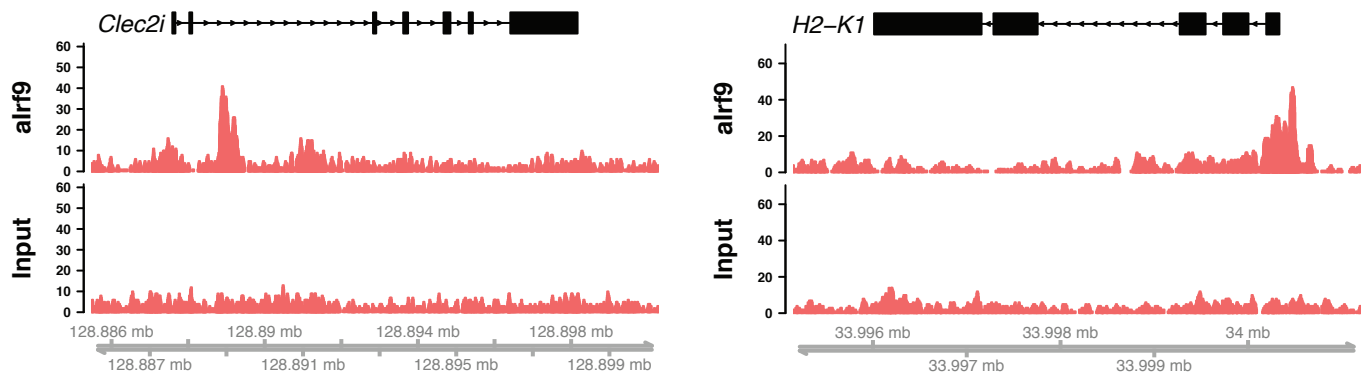

**C**

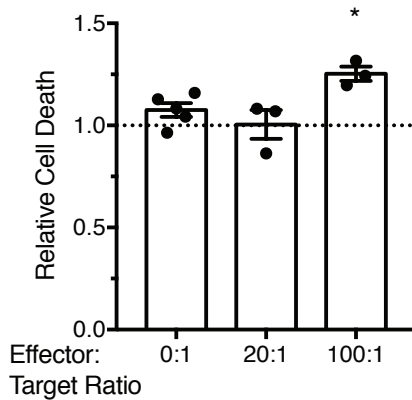

**Figure S4. IRF9 regulates IFN signaling and expression of ligands for NK cell receptors. Related to Figure 4.**

(A) Top ten enriched pathways as calculated by Reactome including the number of differentially expressed genes per pathway. Bar plots depict  $-\log_{10}$  P values calculated by Reactome. (B) Representative gene tracks from IRF9 ChIP-Seq. (C) Congenically distinct “target” NK cells from WT and *Irf9*<sup>-/-</sup> mice were co-incubated with the indicated ratios of “effector” WT NK cells and pro-inflammatory cytokines for 16 hours. Cell death of *Irf9*<sup>-/-</sup> target NK cells is shown relative to cell death of WT target NK cells from the same well. Bar graphs show data as mean  $\pm$ SEM, and are representative of two experiments with 3-5 replicates each. Means were compared to a hypothetical value of 1 using a one-sample t test (\* $P < 0.05$ ). RNA-Seq is 3 biological replicates. ChIP-Seq is 3 experiments of 20-25 pooled mice per experiment.
